# Supplementary material for: Bacteria Resistances in Positive Urine Cultures from a Tertiary Care Hospital in Western Part of Romania – a Cross-Sectional Study
Source: Preprints.org preprint supplement (doi:10.20944/preprints202410.2184.v1), 2024-10-28
Supplement: Supplementary file 1 [file supplementary]

**Supplementary Materials:**

Supplemental Table 1 – bacteria distribution per department

| Department | Number and % |
| --- | --- |
| Burns department | 1 (0.08%) |
| Intensive Care Unit | 49 (3.9%) |
| Cardiology | 20 (1.6%) |
| Surgery | 22 (1.7%) |
| Diabetes and metabolic diseases | 104 (8.2%) |
| Endocrinology | 9 (0.7%) |
| Outpatients | 336 (26.6%) |
| Gastroenterology | 100 (7.9%) |
| Gynaecology | 12 (1%) |
| Neurosurgery | 12 (1%) |
| Nephrology | 142 (11.3%) |
| Neurology | 165 (13.1%) |
| Orthopaedics | 43 (3.4%) |
| Traumatology | 8 (0.6%) |
| Psychiatry | 3 (0.2%) |
| Urology | 236 (18.7%) |

Supplemental table 2 – bacteria resistances.

| Antibiotic | *Escherichia Coli* | *Enterococcus Ispp.* | *Klebsiella* spp. | *Proteus* spp. | *Pseudomonas* spp. | *Staphylococcus aureus* | *Enterobacter* spp. | Overall |
| --- | --- | --- | --- | --- | --- | --- | --- | --- |
| Amikacin | **98.5%** | - | 97% | 93.9% | **84.8%** | 100% | 90.9% | 95.6% |
| Gentamycin | **93.2%** | **68%** | 87.2% | 76.6% | 76.3% | 86.1% | 80.6% | 84.1% |
| Ampicillin | 78.8% | **86.2%** | **56.8%** | 79.2% | - | 63.6% | 61.5% | 77.7% |
| Amoxicillin-clavulanic acid | **50%** | **89.9%** | 60% | 75% | - | 100% | - | 87.1% |
| Oxacillin | **-** | **-** | - | - | - | 68.2% | - | - |
| Piperacillin-Tazobactam | **78.7%** | **-** | **56.7%** | **87%** | 74.4% | 100% | 73.9% | 72% |
| Meropenem | **100%** | **-** | **90.7%** | 100% | **83.3%** | 100% | 90.9% | 95.9% |
| Imipenem | **100%** | **-** | **93%** | 100% | **81.5%** | 100% | 92% | 97.2% |
| Ceftriaxone | **88.3%** | **-** | **67.5%** | 86.4% | - | 100% | 75% | 83.9% |
| Ceftazidime | **87.8%** | **-** | **70.4%** | 83.3% | 81.1% | 83.3% | 76.9% | 82% |
| Cefepime | **88.4%** | **-** | **67.8%** | **97.3%** | 82.1% | - | 76.2% | 83% |
| Cefuroxime | **84.4%** | **-** | **63.4%** | 82.6% | - | 98.9% | 77.8% | 78.9% |
| Colistin | 97.9% | - | 100% (62) | - | 100% | - | - | 98.4% |
| Ciprofloxacin | **77.6%** | **18.7%** | 70.6% | 75.7% | 70% | 75% | 71.4% | 65.8% |
| Levofloxacin | **79.3%** | **40.9%** | 73.1% | 76.3% | 66.7% | 66.7% | 68% | 67.2% |
| Trimethoprim-sulfamethoxazole | 72.5% | - | 77% | 66.7% | - | 76.7% | 78.6% | 73.1% |

Legend: Bolded and underlined values are higher compared to the overall results and bolded one lower – statistical test Chi-square test.
